# Supplementary material for: Green synthesis of nitrogen-doped carbon dots from lentil and its application for colorimetric determination of thioridazine hydrochloride
Source: Royal Society of Chemistry journal article supplement (doi:10.1039/c6ra22899b), 2016-01-01
Supplement: c6ra22899b1.pdf [file c6ra22899b1.pdf]

## **Electronic Supplementary Materials**

**Green synthesis of nitrogen-doped carbon dots from lentil and its application for colorimetric determination of thioridazine hydrochloride**

Mohammad Amjadi\*, Tooba Hallaj, Masoumeh Aghdas Mayan

*Department of Analytical Chemistry, Faculty of Chemistry, University of Tabriz, Tabriz*

*5166616471, Iran*

**Fig. S1.** (a) Effect of N-CDs volume on the decreased absorption intensity. Conditions: buffer (1.0 mM), AgNPs (1.5 mL), pH=3.5, time 10 min, n=3; (b) Effect of AgNPs volume. Conditions: N-CDs (200  $\mu$ L), other conditions are as in a; (c) Effect of pH value. Conditions are as in b; (d) Effect of time. pH=3.0, other conditions are as in c.

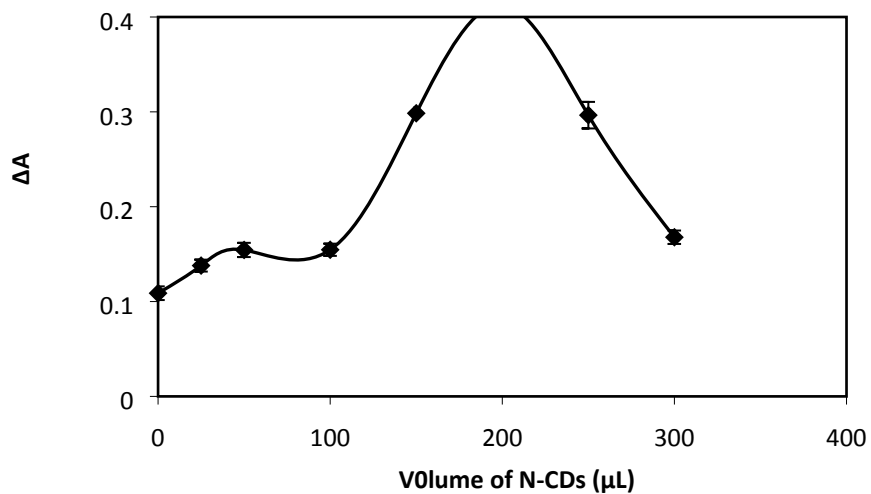

Fig.S1a.

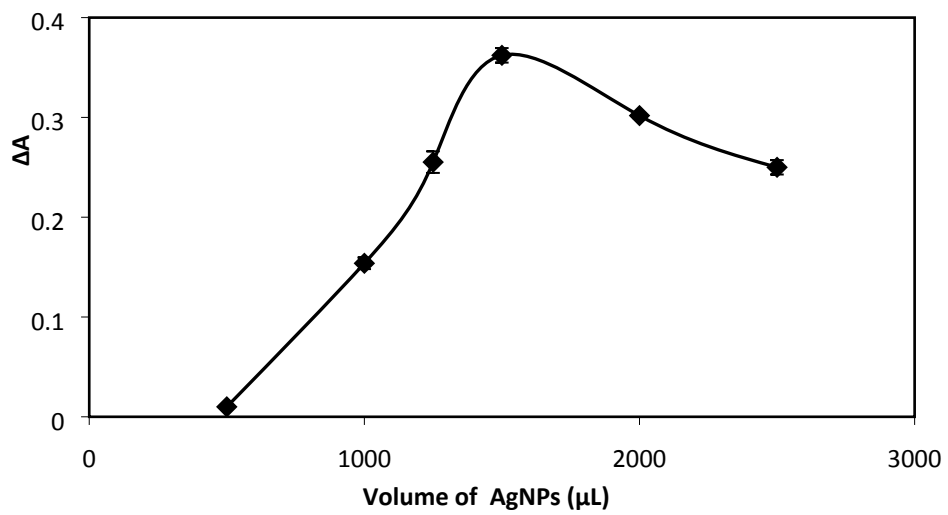

Fig.S1b.

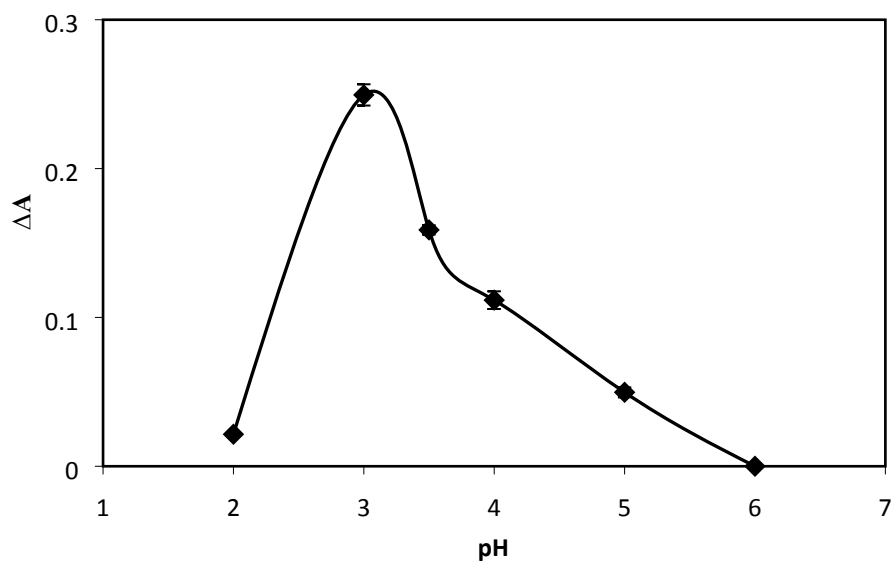

Fig.S1c.

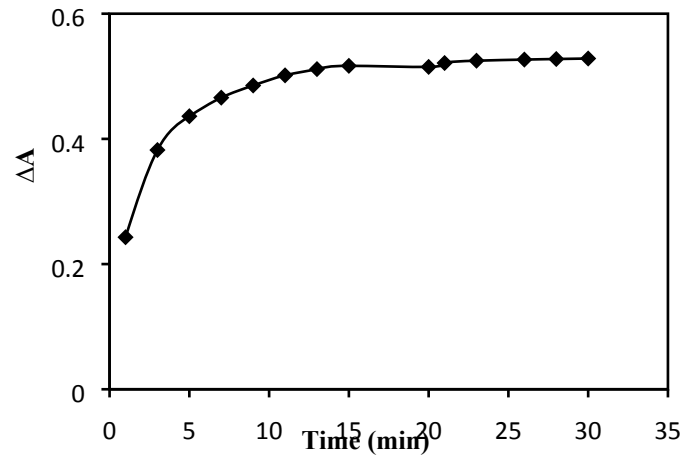

Fig.S1d.
